# Supplementary material for: The biphasic dose effect of lychee (Litchi chinensis Sonn.) pulp phenolic extract on alcoholic liver disease in mice
Source: Royal Society of Chemistry journal article supplement (doi:10.1039/c6fo01166g), 2016-11-29
Supplement: c6fo01166g1.pdf [file c6fo01166g1.pdf]

### Supporting Information for lychee pulp phenolic extract

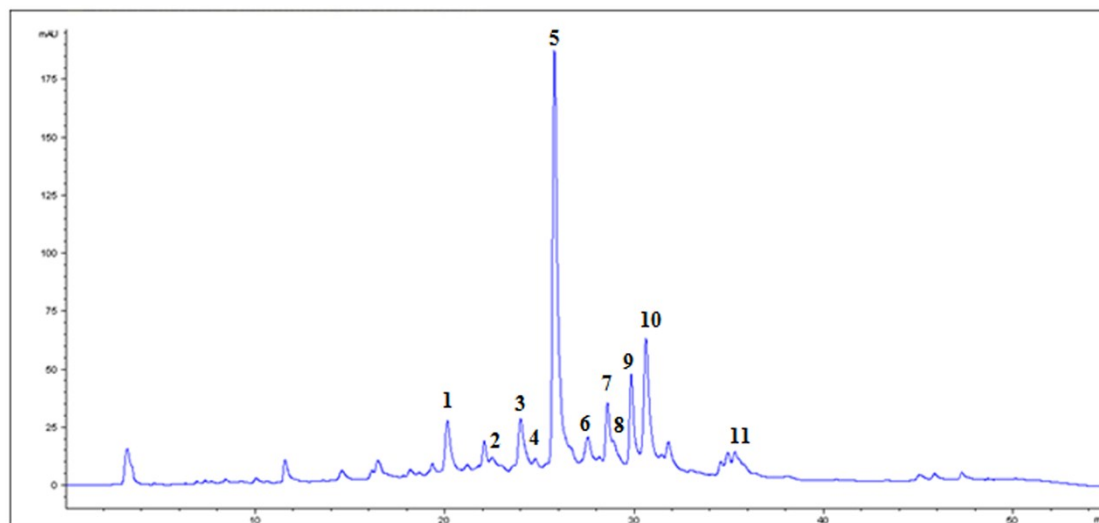

**Fig. 1 HPLC profile of lychee pulp phenolic extract (LPPE)**

**Table 1 Contents of phenolic compositions in LPPE**

| Peak no. | Retention time (min) | Maximum absorption wavelength (nm) | Compound                                      | Content                    |
|----------|----------------------|------------------------------------|-----------------------------------------------|----------------------------|
| 1        | 20.12                | 230, 279                           | Procyanidin B2                                | 104.98 ± 3.11 <sup>a</sup> |
| 2        | 22.47                | 232, 279                           | Epicatechin                                   | 34.91 ± 1.20 <sup>a</sup>  |
| 3        | 23.99                | 230, 279                           | -                                             | 33.96 ± 0.96 <sup>b</sup>  |
| 4        | 24.75                | 230, 279                           | -                                             | 6.36 ± 0.21 <sup>b</sup>   |
| 5        | 25.77                | 255, 352                           | Quercetin 3-O-rutinoside-7-O-a-L-rhamnosidase | 260.49 ± 9.21 <sup>a</sup> |
| 6        | 27.53                | 279, 322                           | -                                             | 4.56 ± 0.13 <sup>b</sup>   |
| 7        | 28.57                | 265, 346                           | -                                             | 22.79 ± 0.45 <sup>c</sup>  |
| 8        | 28.88                | 268, 352                           | -                                             | 16.04 ± 0.56 <sup>c</sup>  |
| 9        | 29.82                | 254, 352                           | -                                             | 26.76 ± 0.43 <sup>c</sup>  |
| 10       | 30.6                 | 255, 352                           | Rutin                                         | 54.06 ± 1.52 <sup>a</sup>  |
| 11       | 35.29                | 254, 354                           | Isorhamnestin-3-O-rutinoside                  | 16.49 ± 0.50 <sup>a</sup>  |

The phenolic composition and contents of the extract were determined by HPLC-DAD according to previously published methods.<sup>16</sup> Information of phenolic compositions have compared with the previous research on phenolic compositions of lychee pulp.<sup>11</sup> Thus, peak 3, 4, 6 were deduced as procyanidins, and peak 7-9 were deduced as flavanone glycosides. The contents were expressed as means ± SD (n=3).

<sup>a</sup> Procyanidin B2, epicatechin, quercetin 3-O-rutinoside-7-O-a-L-rhamnosidase, rutin and isorhamnestin-3-O-rutinoside were quantified with their own standard curves (mg g<sup>-1</sup>).

<sup>b</sup> Peak 3, 4, 6 were calculated as epicatechin equivalent (mg EE g<sup>-1</sup>) using the standard curve of epicatechin.

<sup>c</sup> Peak 7-9 were calculated as rutin equivalent (mg RE g<sup>-1</sup>) using the standard curve of rutin.
